# Supplementary material
Source: PubMed Central journal article supplement (PMC7178078)
Supplement: NIHMS1580377-supplement-2.pdf [file NIHMS1580377-supplement-2.pdf]

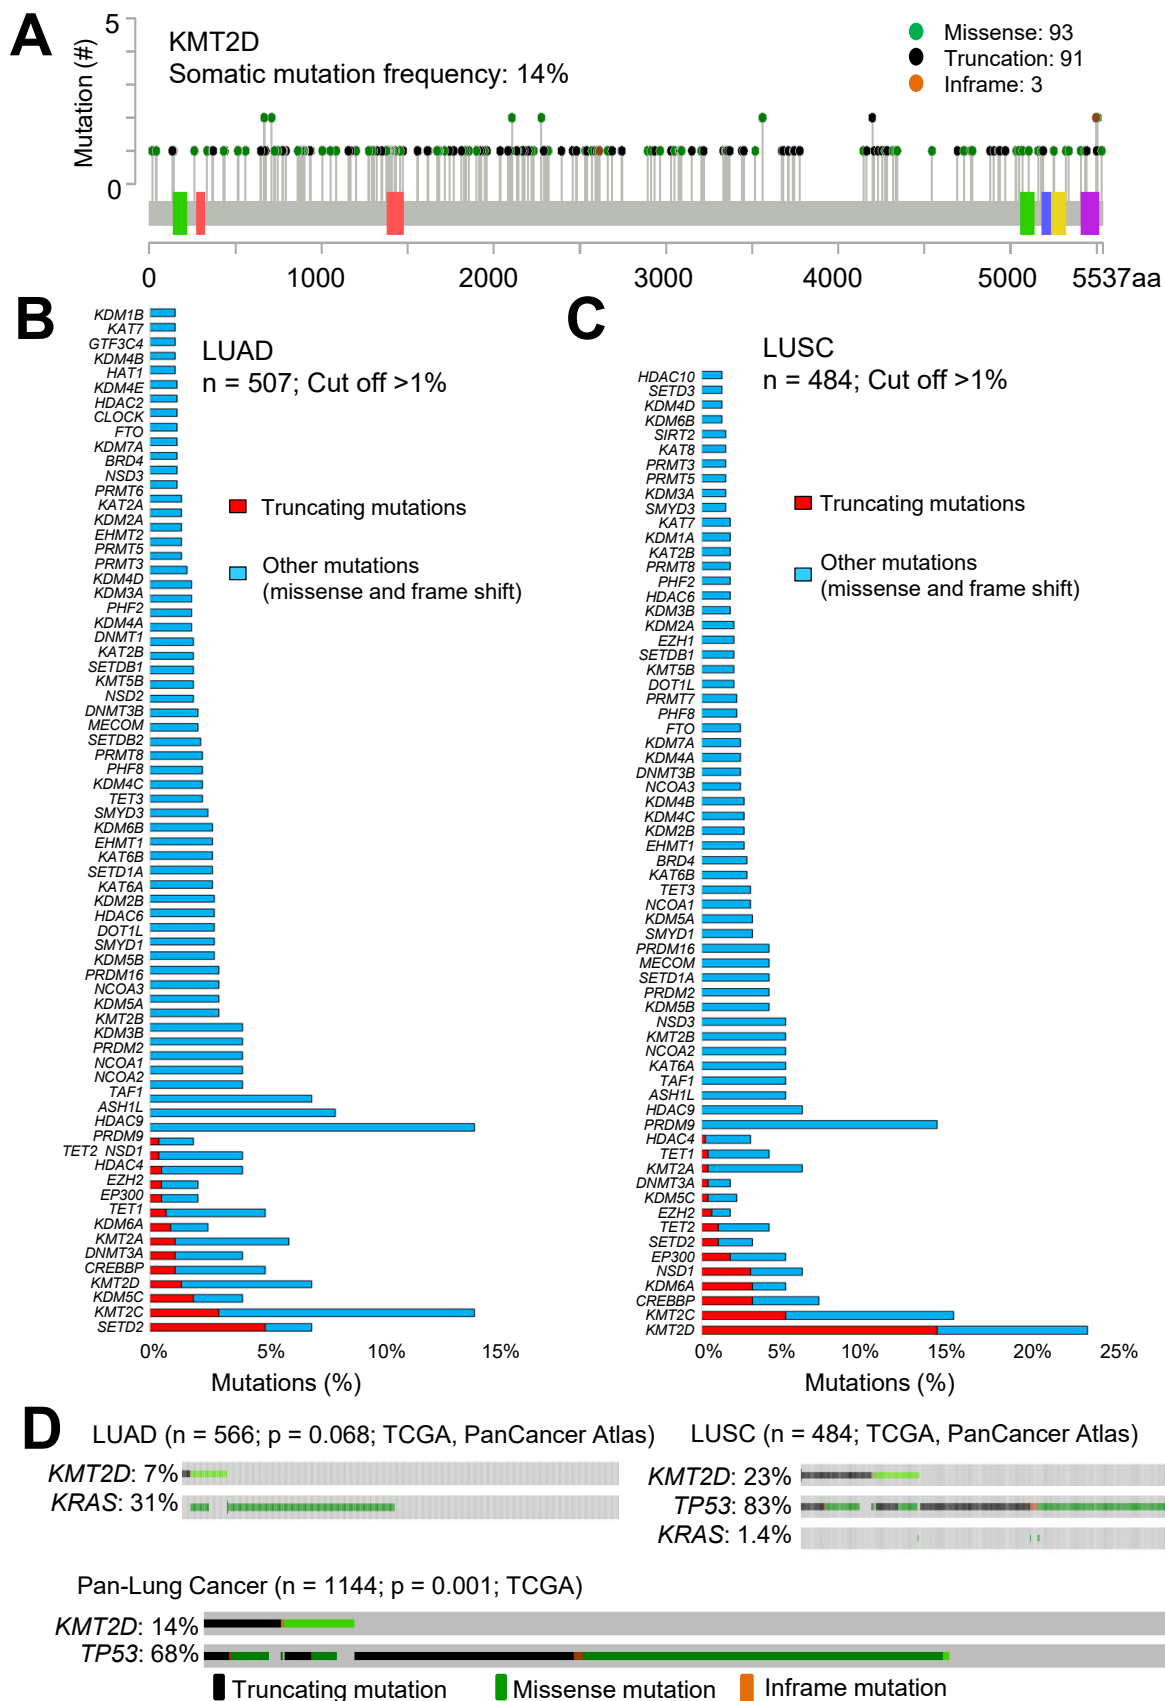

**Figure S1**, related to **Figure 1**. **(A)** The lollipop graph shows mutation profiles (missense, truncation, and inframe) in the *KMT2D* gene in the Pan-lung cancer TCGA dataset (n = 1144) in the cBioPortal (<http://www.cbioportal.org>). The percentage of truncating (loss-of-function) mutations in *KMT2D* was 48.7% (91/187). **(B and C)** *KMT2D* is among the most highly inactivated epigenetic modifiers in human lung cancer. Mutations in epigenetic modifiers in the lung adenocarcinoma (LUAD; n = 507) and lung squamous cell carcinoma (LUSC; n = 484) datasets were analyzed using the cBioPortal. Bar graphs show alterations in epigenetic modifiers containing more than 1% mutations in LUAD **(B)** and LUSC **(C)** samples. Other mutations represent missense and frame shift mutations. **(D)** Analysis of the TCGA LUAD and LUSC dataset in the cBioPortal showed that *KMT2D* mutations often co-occurred with *KRAS* mutations (p = 0.068, Chi-squared test) in human LUAD samples and with *TP53* mutations (p = 0.001, Chi-squared test) in human Pan-lung cancer and LUSC samples. Of the TCGA dataset (n = 1144), *KMT2D*-altered samples and some other samples are shown.

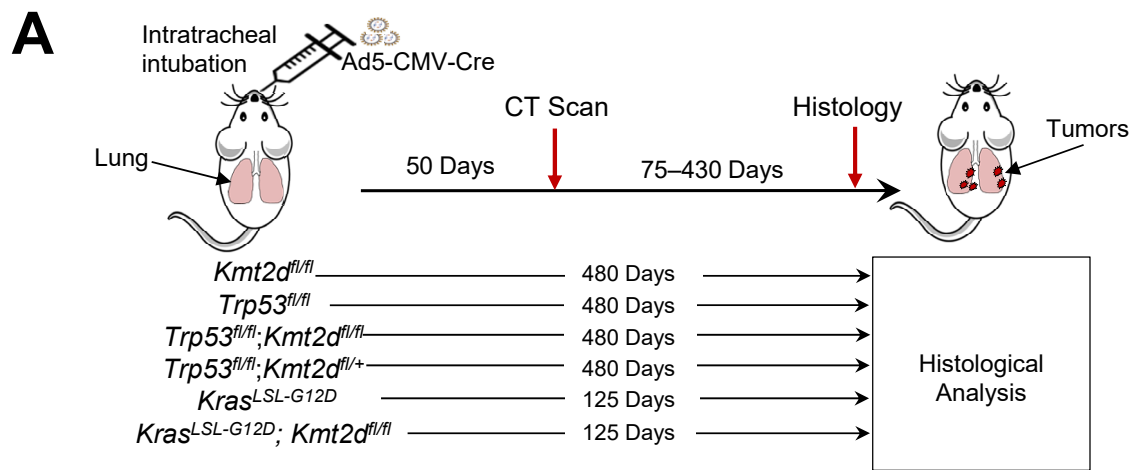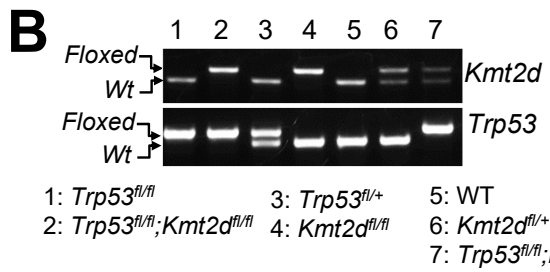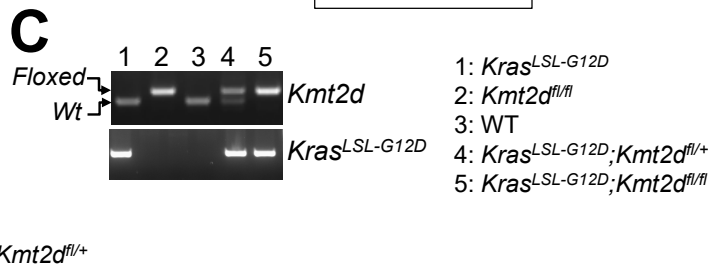

**D**

| Groups                                     | <i>Kmt2d<sup>fl/fl</sup></i> | <i>Trp53<sup>fl/fl</sup></i> | <i>Trp53<sup>fl/fl</sup>;Kmt2d<sup>fl/+</sup></i> | <i>Trp53<sup>fl/fl</sup>;Kmt2d<sup>fl/fl</sup></i> |
|--------------------------------------------|------------------------------|------------------------------|---------------------------------------------------|----------------------------------------------------|
| Pulmonary adenocarcinomas                  | 0/5 (0%)                     | 0/5 (0%)                     | 0/5 (0%)                                          | 0/5 (0%)                                           |
| Pulmonary adenomas                         | 0/5 (0%)                     | 0/5 (0%)                     | 0/5 (0%)                                          | 0/5 (0%)                                           |
| Multifocal, bronchioloalveolar hyperplasia | 0/5 (0%)                     | 0/5 (0%)                     | 0/5 (0%)                                          | 0/5 (0%)                                           |
| BALT hyperplasia                           | 4/5 (80%)                    | 4/5 (80%)                    | 4/5 (80%)                                         | 4/5 (80%)                                          |

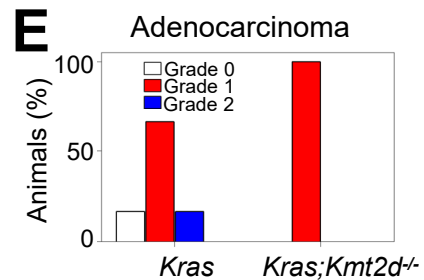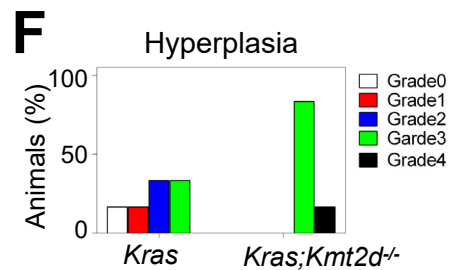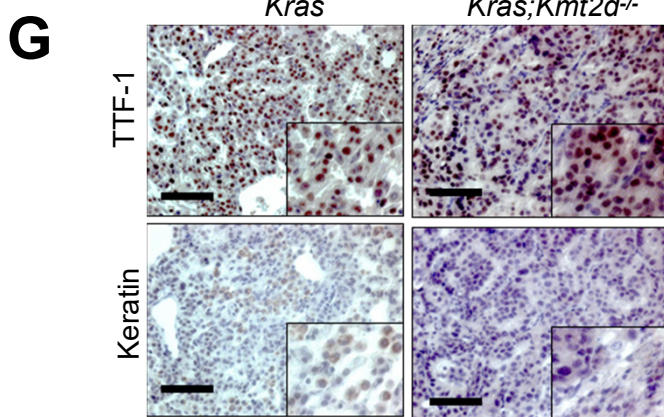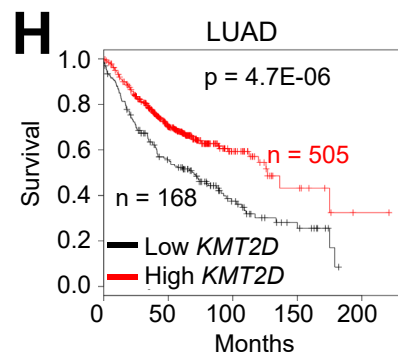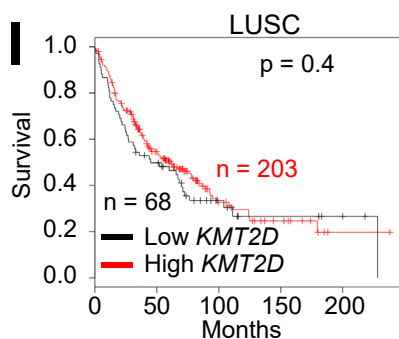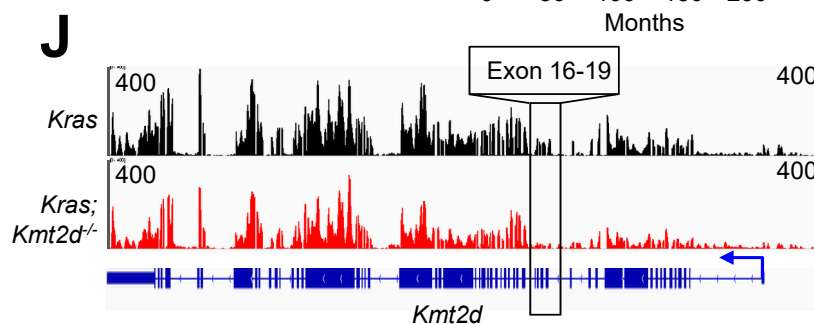

**Figure S2**, related to **Figure 1: *Kmt2d* loss accelerates KRAS-driven LUAD tumorigenesis**. (A) Our strategy to induce and monitor lung tumorigenesis using new genetically engineered mouse models. (B and C) Genotyping experiments using specific primers showed the generation of *Trp53<sup>fl/fl</sup>;Kmt2d<sup>fl/fl</sup>* (B) and *Kras<sup>LSL-G12D</sup>;Kmt2d<sup>fl/fl</sup>* (C) mice. (D) Pulmonary tumors were not observed in lung sections examined microscopically in *Kmt2d<sup>fl/fl</sup>*, *Trp53<sup>fl/fl</sup>*, *Trp53<sup>fl/fl</sup>;Kmt2d<sup>fl/+</sup>*, and *Trp53<sup>fl/fl</sup>;Kmt2d<sup>fl/fl</sup>* mice with adeno5 (Ad5)-CMV-Cre mediated gene deletion in the lungs. (E and F) Microscopic analysis of Ad5-CMV-Cre-infected lungs of *Kras* and *Kras;Kmt2d<sup>-/-</sup>* mice showed that *Kras;Kmt2d<sup>-/-</sup>* mice typically had a higher percentage of pulmonary parenchyma effaced by pulmonary adenocarcinoma(s) (E) and bronchioloalveolar hyperplasia (F) than did *Kras* mice. Tumors and epithelial hyperplasia were graded based on the percentage of the lung effaced by these lesions; higher grades indicate a larger percentage of the pulmonary parenchyma affected. (G) Immunohistological (IHC) staining of *Kras* and *Kras;Kmt2d<sup>-/-</sup>* lung tumors showed that *Kras;Kmt2d<sup>-/-</sup>* lung tumors, like *Kras* lung tumors, were positive for the lung adenocarcinoma marker TTF-1 and had low levels of the lung squamous carcinoma marker Keratin 5. Scale bars, 100  $\mu$ m. (H and I) Kaplan-Meier survival analysis showed that low *KMT2D* mRNA levels correlated with poorer survival in LUAD patients (H) but not in LUSC patients (I). The KM Plotter database (<http://kmplot.com/analysis>) was used for this analysis. For LUAD (H), the lower quartile was used as a cutoff to divide the samples into *KMT2D*-low (the lowest 25%) and *KMT2D*-high (the remaining 75%) groups. For LUSC (I), the auto cut-off function was used to divide samples into low and high *KMT2D* groups. *KMT2D* probe set, 227527\_at. In (H and I), the statistical analysis was performed using the two-sided log-rank test. (J) Genome browser view of normalized signals of RNA-seq data at the *Kmt2d* locus of *Kras* and *Kras;Kmt2d<sup>-/-</sup>* lung tumor samples showed that *Kras;Kmt2d<sup>-/-</sup>* mice lost mRNA peaks at exons 16-19. Combined data of two biological replicates from each group are shown.

**Table S1**, related to **Figure 2**: Gene lists for metabolic pathway, glycolysis, and OXPHOS on the basis of DAVID analysis

**Metabolic pathway gene list**

|    |          |    |          |     |          |     |         |     |           |     |          |
|----|----------|----|----------|-----|----------|-----|---------|-----|-----------|-----|----------|
| 1  | Sox9     | 41 | Met      | 81  | Prdx3    | 121 | Cox8a   | 161 | Bax       | 201 | Fabp1    |
| 2  | Fam162a  | 42 | Slc16a3  | 82  | Atp5o    | 122 | Fh1     | 162 | Hadha     | 202 | Nsdhl    |
| 3  | Chst4    | 43 | Homer1   | 83  | Retsat   | 123 | Ndufb4  | 163 | Mtrr      | 203 | Gpd2     |
| 4  | Mif      | 44 | Hdlbp    | 84  | Atp5g3   | 124 | Atp1b1  | 164 | Slc25a4   | 204 | Cryz     |
| 5  | Ak4      | 45 | Cldn9    | 85  | Ndufab1  | 125 | Timm10  | 165 | Ndufc1    | 205 | Aldh9a1  |
| 6  | Stc2     | 46 | Bpnt1    | 86  | Pdha1    | 126 | Slc25a5 | 166 | Idh3g     | 206 | Ephx1    |
| 7  | Dsc2     | 47 | Mxi1     | 87  | Timm13   | 127 | Cox5a   | 167 | Abcb7     | 207 | H2afz    |
| 8  | Tpi1     | 48 | Elf3     | 88  | Mtx2     | 128 | Got2    | 168 | Dld       | 208 | Acads    |
| 9  | Nt5e     | 49 | Cd44     | 89  | Ndufs6   | 129 | Cyb5r3  | 169 | Ndufa7    | 209 | Abca5    |
| 10 | Pgk1     | 50 | Srd5a3   | 90  | Maob     | 130 | Gpx4    | 170 | Atp5e     | 210 | Gstk1    |
| 11 | Sdc1     | 51 | Cited2   | 91  | Etfhdh   | 131 | Ndufa1  | 171 | Ugdh      | 211 | Bcar3    |
| 12 | Egln3    | 52 | Hmmr     | 92  | Ndufa9   | 132 | Cox7a2  | 172 | Ccdc58    | 212 | Ephx2    |
| 13 | Glrx     | 53 | Mdh2     | 93  | Atp5j2   | 133 | Atp6ap1 | 173 | Pcbd1     | 213 | Rxrg     |
| 14 | Pcx      | 54 | Sap30    | 94  | Uqcrq    | 134 | Sdhc    | 174 | Suclg2    | 214 | Gc       |
| 15 | Gfpt1    | 55 | Kif20a   | 95  | Atp6v1e1 | 135 | Decr1   | 175 | Grhpr     | 215 | Paox     |
| 16 | Ldha     | 56 | Mpi      | 96  | Fxn      | 136 | Timm8b  | 176 | Ywhah     | 216 | Nr3c2    |
| 17 | Hspa5    | 57 | Gpi1     | 97  | Dlat     | 137 | Aifm1   | 177 | Acsl4     | 217 | Rbp1     |
| 18 | Eno1     | 58 | Phb2     | 98  | Tomm22   | 138 | Etfa    | 178 | Apex1     | 218 | Pex7     |
| 19 | Aldh7a1  | 59 | Cycs     | 99  | Atp5c1   | 139 | Acat1   | 179 | Hsd17b11  | 219 | Pex26    |
| 20 | Gale     | 60 | Mgst3    | 100 | Atp5f1   | 140 | Lrpprc  | 180 | Hsd17b4   | 220 | Nedd4    |
| 21 | Tsta3    | 61 | Ndufa5   | 101 | Slc25a3  | 141 | Mrpl15  | 181 | Gabarapl1 | 221 | Slc22a18 |
| 22 | Pfkp     | 62 | Ndufa4   | 102 | Mrpl34   | 142 | Mrpl35  | 182 | Alad      | 222 | Isoc1    |
| 23 | Hk2      | 63 | Hspa9    | 103 | Vdac2    | 143 | Ndufs7  | 183 | Cbr1      | 223 | Nudt12   |
| 24 | Sod1     | 64 | Atp5d    | 104 | Ndufb2   | 144 | Atp5j   | 184 | Acsl5     |     |          |
| 25 | Fkbp4    | 65 | Hsd17b10 | 105 | Pmpca    | 145 | Timm17a | 185 | Erp29     |     |          |
| 26 | Pkp2     | 66 | Suclg1   | 106 | Ndufa2   | 146 | Uqcr10  | 186 | Car6      |     |          |
| 27 | Pygb     | 67 | Cox6a1   | 107 | Uqcrc2   | 147 | Atp5g1  | 187 | Acadl     |     |          |
| 28 | Slc25a13 | 68 | Atp5b    | 108 | Ndufa3   | 148 | Ndufs8  | 188 | Sms       |     |          |
| 29 | Hs2st1   | 69 | Vdac1    | 109 | Uqcrh    | 149 | Aco2    | 189 | S100a10   |     |          |
| 30 | Pgam1    | 70 | Acadm    | 110 | Atp5a1   | 150 | Mrps12  | 190 | Idi1      |     |          |
| 31 | Gys1     | 71 | Immt     | 111 | Timm50   | 151 | Polr2f  | 191 | Hsd17b7   |     |          |
| 32 | Me1      | 72 | Uqcr11   | 112 | Atp5g2   | 152 | Atp6v0e | 192 | Adipor2   |     |          |
| 33 | Idh1     | 73 | Cox6b1   | 113 | Mrps15   | 153 | Sdha    | 193 | Cpox      |     |          |
| 34 | P4ha1    | 74 | Cox7c    | 114 | Phyh     | 154 | Por     | 194 | Metap1    |     |          |
| 35 | Pam      | 75 | Sdhc     | 115 | Afg3l2   | 155 | Grpel1  | 195 | Cbr3      |     |          |
| 36 | Ak3      | 76 | Cox7a2l  | 116 | Cyc1     | 156 | Cs      | 196 | Ncaph2    |     |          |
| 37 | Slc37a4  | 77 | Ndufa6   | 117 | Ndufb5   | 157 | Mrps30  | 197 | Ostc      |     |          |
| 38 | Cdk1     | 78 | Uqcrb    | 118 | Ndufs4   | 158 | Eci1    | 198 | Urod      |     |          |
| 39 | Rars     | 79 | Atp5h    | 119 | Cox4i1   | 159 | Ndufb6  | 199 | Auh       |     |          |
| 40 | Mdh1     | 80 | Cox6c    | 120 | Atp6v1f  | 160 | Pdk4    | 200 | D2hgdh    |     |          |

**Table S1**, related to **Figure 2**: Continued**Glycolysis gene list**

|    |          |    |         |
|----|----------|----|---------|
| 1  | Sox9     | 41 | Met     |
| 2  | Fam162a  | 42 | Slc16a3 |
| 3  | Chst4    | 43 | Homer1  |
| 4  | Mif      | 44 | Hdlbp   |
| 5  | Ak4      | 45 | Cldn9   |
| 6  | Stc2     | 46 | Bpnt1   |
| 7  | Dsc2     | 47 | Mxi1    |
| 8  | Tpi1     | 48 | Elf3    |
| 9  | Nt5e     | 49 | Cd44    |
| 10 | Pgk1     | 50 | Srd5a3  |
| 11 | Sdc1     | 51 | Cited2  |
| 12 | Egln3    | 52 | Hmmr    |
| 13 | Glrx     | 53 | Mdh2    |
| 14 | Pcx      | 54 | Sap30   |
| 15 | Gfpt1    | 55 | Kif20a  |
| 16 | Ldha     | 56 | Mpi     |
| 17 | Hspa5    |    |         |
| 18 | Eno1     |    |         |
| 19 | Aldh7a1  |    |         |
| 20 | Gale     |    |         |
| 21 | Tsta3    |    |         |
| 22 | Pfkp     |    |         |
| 23 | Hk2      |    |         |
| 24 | Sod1     |    |         |
| 25 | Fkbp4    |    |         |
| 26 | Pkp2     |    |         |
| 27 | Pygb     |    |         |
| 28 | Slc25a13 |    |         |
| 29 | Hs2st1   |    |         |
| 30 | Pgam1    |    |         |
| 31 | Gys1     |    |         |
| 32 | Me1      |    |         |
| 33 | ldh1     |    |         |
| 34 | P4ha1    |    |         |
| 35 | Pam      |    |         |
| 36 | Ak3      |    |         |
| 37 | Slc37a4  |    |         |
| 38 | Cdk1     |    |         |
| 39 | Rars     |    |         |
| 40 | Mdh1     |    |         |

**OXPHOS gene list**

|    |          |    |          |     |         |
|----|----------|----|----------|-----|---------|
| 1  | Gpi1     | 41 | Uqcrq    | 81  | Atp6ap1 |
| 2  | Phb2     | 42 | Atp6v1e1 | 82  | Sdhc    |
| 3  | Cycs     | 43 | Fxn      | 83  | Decr1   |
| 4  | Mgst3    | 44 | Dlat     | 84  | Timm8b  |
| 5  | Ldha     | 45 | Tomm22   | 85  | Aifm1   |
| 6  | Ndufa5   | 46 | Atp5c1   | 86  | Etfa    |
| 7  | Ndufa4   | 47 | Atp5f1   | 87  | Acat1   |
| 8  | Hspa9    | 48 | Slc25a3  | 88  | Lrprrc  |
| 9  | Atp5d    | 49 | Mrpl34   | 89  | Mrpl15  |
| 10 | Hsd17b10 | 50 | Vdac2    | 90  | Mrpl35  |
| 11 | Suclg1   | 51 | Ndufb2   | 91  | Ndufs7  |
| 12 | Cox6a1   | 52 | Pmpca    | 92  | Atp5j   |
| 13 | Atp5b    | 53 | Ndufa2   | 93  | Timm17a |
| 14 | Vdac1    | 54 | Uqcrc2   | 94  | Uqcr10  |
| 15 | Acadm    | 55 | Ndufa3   | 95  | Atp5g1  |
| 16 | Immt     | 56 | Uqcrh    | 96  | Ndufs8  |
| 17 | Uqcr11   | 57 | Mdh2     | 97  | Aco2    |
| 18 | Cox6b1   | 58 | Atp5a1   | 98  | Mrps12  |
| 19 | Cox7c    | 59 | Timm50   | 99  | Polr2f  |
| 20 | Sdhc     | 60 | Atp5g2   | 100 | Atp6v0e |
| 21 | Cox7a2l  | 61 | Mrps15   | 101 | Sdha    |
| 22 | Ndufa6   | 62 | Phyh     | 102 | Por     |
| 23 | Uqcrb    | 63 | Afg3l2   | 103 | Grpel1  |
| 24 | Atp5h    | 64 | Cyc1     | 104 | Cs      |
| 25 | ldh1     | 65 | Ndufb5   | 105 | Mrps30  |
| 26 | Cox6c    | 66 | Ndufs4   | 106 | Eci1    |
| 27 | Prdx3    | 67 | Cox4i1   | 107 | Ndufb6  |
| 28 | Atp5o    | 68 | Atp6v1f  | 108 | Pdk4    |
| 29 | Retsat   | 69 | Cox8a    | 109 | Bax     |
| 30 | Atp5g3   | 70 | Fh1      | 110 | Hadha   |
| 31 | Ndufab1  | 71 | Ndufb4   | 111 | Mtrr    |
| 32 | Pdha1    | 72 | Atp1b1   | 112 | Slc25a4 |
| 33 | Timm13   | 73 | Timm10   | 113 | Ndufc1  |
| 34 | Mtx2     | 74 | Slc25a5  | 114 | ldh3g   |
| 35 | Mdh1     | 75 | Cox5a    | 115 | Abcb7   |
| 36 | Ndufs6   | 76 | Got2     | 116 | Dld     |
| 37 | Maob     | 77 | Cyb5r3   | 117 | Ndufa7  |
| 38 | Etfhdh   | 78 | Gpx4     | 118 | Atp5e   |
| 39 | Ndufa9   | 79 | Ndufa1   |     |         |
| 40 | Atp5j2   | 80 | Cox7a2   |     |         |

**Table S2**, related to **Figure 2**: Human LUAD samples used for GSEA analysis

|                  |      |                  |                   |
|------------------|------|------------------|-------------------|
| TCGA-97-8172-01A | high | TCGA-91-8496-01A | low               |
| TCGA-86-7713-01A | high | TCGA-49-4514-01A | low               |
| TCGA-78-7536-01A | high | TCGA-35-4123-01A | low               |
| TCGA-44-7669-01A | high | TCGA-44-3398-01A | low               |
| TCGA-MP-A4T6-01A | high | TCGA-91-A4BD-01A | low               |
| TCGA-53-7626-01A | high | TCGA-05-5429-01A | low               |
| TCGA-69-8254-01A | high | TCGA-55-6972-01A | low               |
| TCGA-62-8398-01A | high | TCGA-50-5055-01A | low               |
| TCGA-73-4662-01A | high | TCGA-75-5146-01A | low               |
| TCGA-55-8206-01A | high | TCGA-64-5778-01A | low               |
| TCGA-69-8255-01A | high | TCGA-49-4488-01A | low               |
| TCGA-86-8056-01A | high | TCGA-05-5423-01A | low               |
| TCGA-86-7954-01A | high | TCGA-67-3770-01A | low               |
| TCGA-55-A490-01A | high | TCGA-38-4632-01A | low               |
| TCGA-50-5946-01A | high | TCGA-05-5420-01A | low               |
| TCGA-55-7994-01A | high | TCGA-64-1677-01A | low               |
| TCGA-50-5066-02A | high | TCGA-05-5428-01A | low               |
| TCGA-MP-A5C7-01A | high | TCGA-35-5375-01A | low               |
| TCGA-86-7953-01A | high | TCGA-50-5068-01A | low               |
| TCGA-55-7576-01A | high | TCGA-50-5066-01A | low               |
| TCGA-38-4630-01A | high | TCGA-35-4122-01A | truncation mutant |
| TCGA-97-8171-01A | high | TCGA-69-7979-01A | truncation mutant |
| TCGA-69-7973-01A | high | TCGA-50-5931-01A | truncation mutant |
| TCGA-L9-A7SV-01A | high | TCGA-80-5607-01A | truncation mutant |



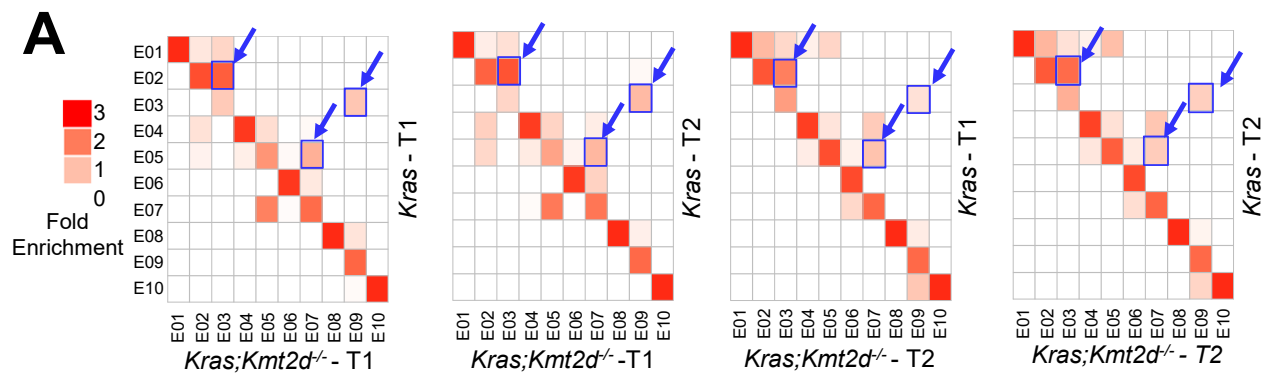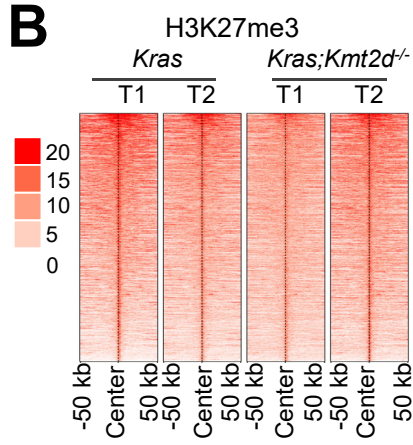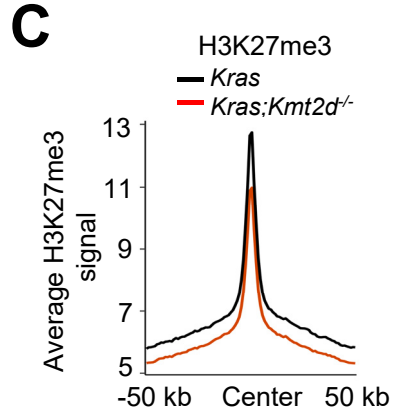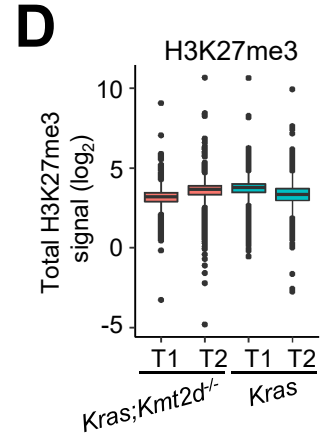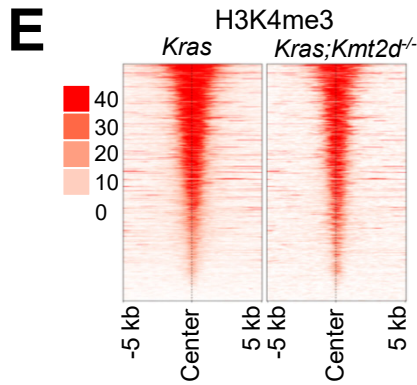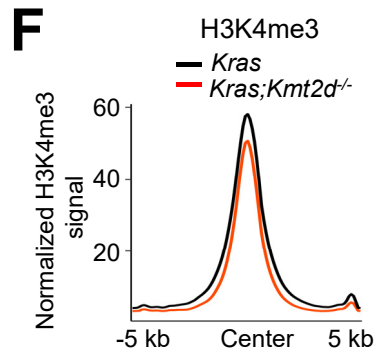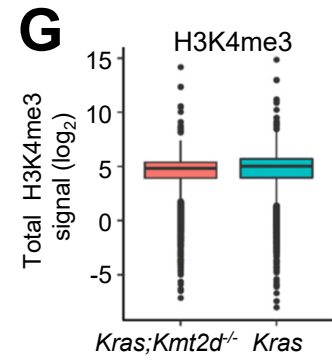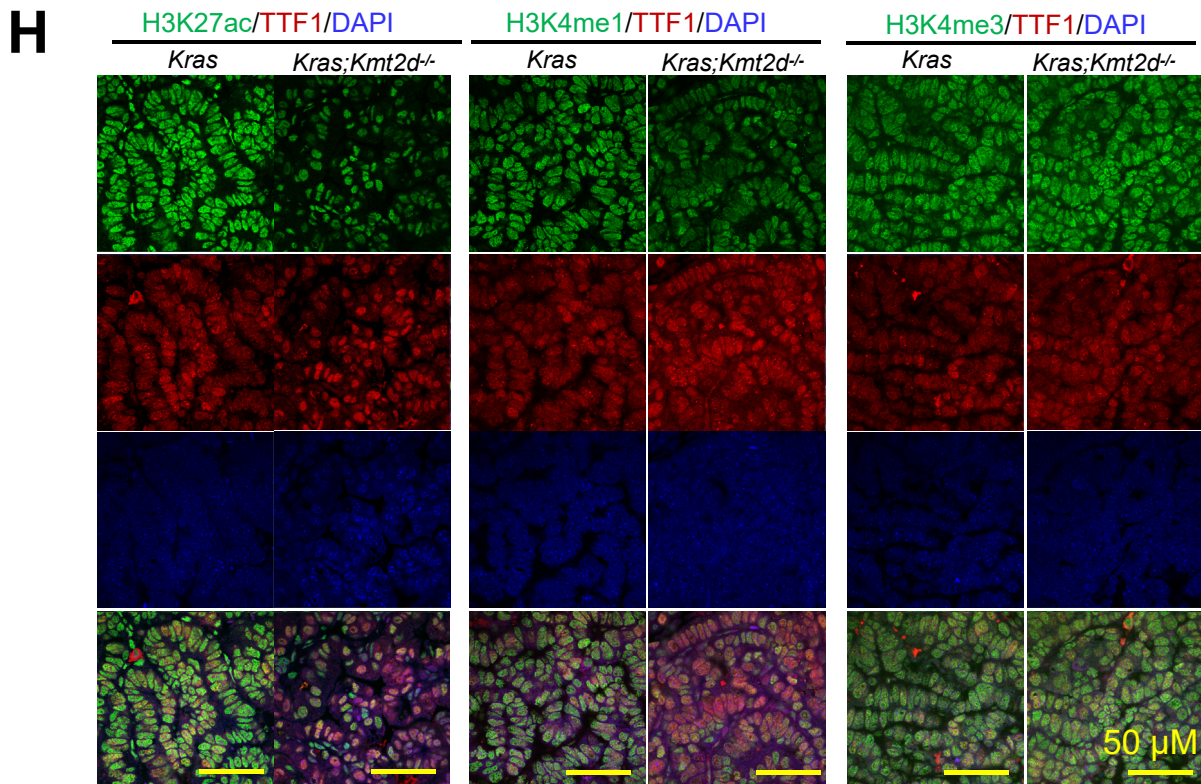

**Figure S3**, related to **Figure 4**. **(A)** The comparison between *Kras* and *Kras;Kmt2d<sup>-/-</sup>* lung tumors revealed three major ChromHMM transitions in chromatin states from *Kras* to *Kras;Kmt2d<sup>-/-</sup>* lung tumors: E2 (active enhancer) to E3 (weak active enhancer); E3 to E9 (low state = very low signal); and E5 (active enhancer containing low H3K4me1) to E7 (H3K27ac-lacking transcribed enhancer). ChromHMM state transitions in the 10-state ChromHMM model were calculated on the basis of six histone modification profiles between *Kras;Kmt2d<sup>-/-</sup>* and *Kras* lung tumors. Heat maps show fold enrichment of transitions of chromatin states between *Kras* and *Kras;Kmt2d<sup>-/-</sup>* lung tumors. The analysis was performed using two different biological replicates. T1, tumor 1; T2, tumor 2. **(B–D)** There was no significant difference in global H3K27me3 levels between *Kras* and *Kras;Kmt2d<sup>-/-</sup>* lung tumors. Heat maps **(B)** and average intensity curves **(C)** of ChIP-Seq reads (RPKM) for H3K27me3 are presented in a 50-kb window centered on the middle of the H3K27me3 peaks in *Kras* and *Kras;Kmt2d<sup>-/-</sup>* lung tumors. H3K27me3 signals ( $\log_2$ RPKM) between *Kras* and *Kras;Kmt2d<sup>-/-</sup>* lung tumors are presented in boxplots **(D)**. **(E–G)** There was no obvious change in global H3K4me3 levels between *Kras* and *Kras;Kmt2d<sup>-/-</sup>* lung tumors. Heat maps **(E)** and average intensity curves **(F)** of ChIP-Seq reads (RPKM) for H3K4me3 are presented in a 5-kb window centered on the middle of H3K4me3 peaks in *Kras* and *Kras;Kmt2d<sup>-/-</sup>* lung tumors. H3K4me3 signals ( $\log_2$ RPKM) between *Kras* and *Kras;Kmt2d<sup>-/-</sup>* lung tumors are presented in boxplots **(G)**. **(H)** Immunofluorescence staining showed that *Kmt2d* loss downregulated enhancer signals (H3K27ac and H3K4me1) but not H3K4me3 in KRAS-induced mouse lung adenocarcinoma. *Kras* and *Kras;Kmt2d<sup>-/-</sup>* mouse lung tumor tissues were analyzed. See “Quantification and statistical analysis” in the STAR Method for the description of the boxplots in **(D)** and **(G)**. Yellow scale bars, 50  $\mu$ m.



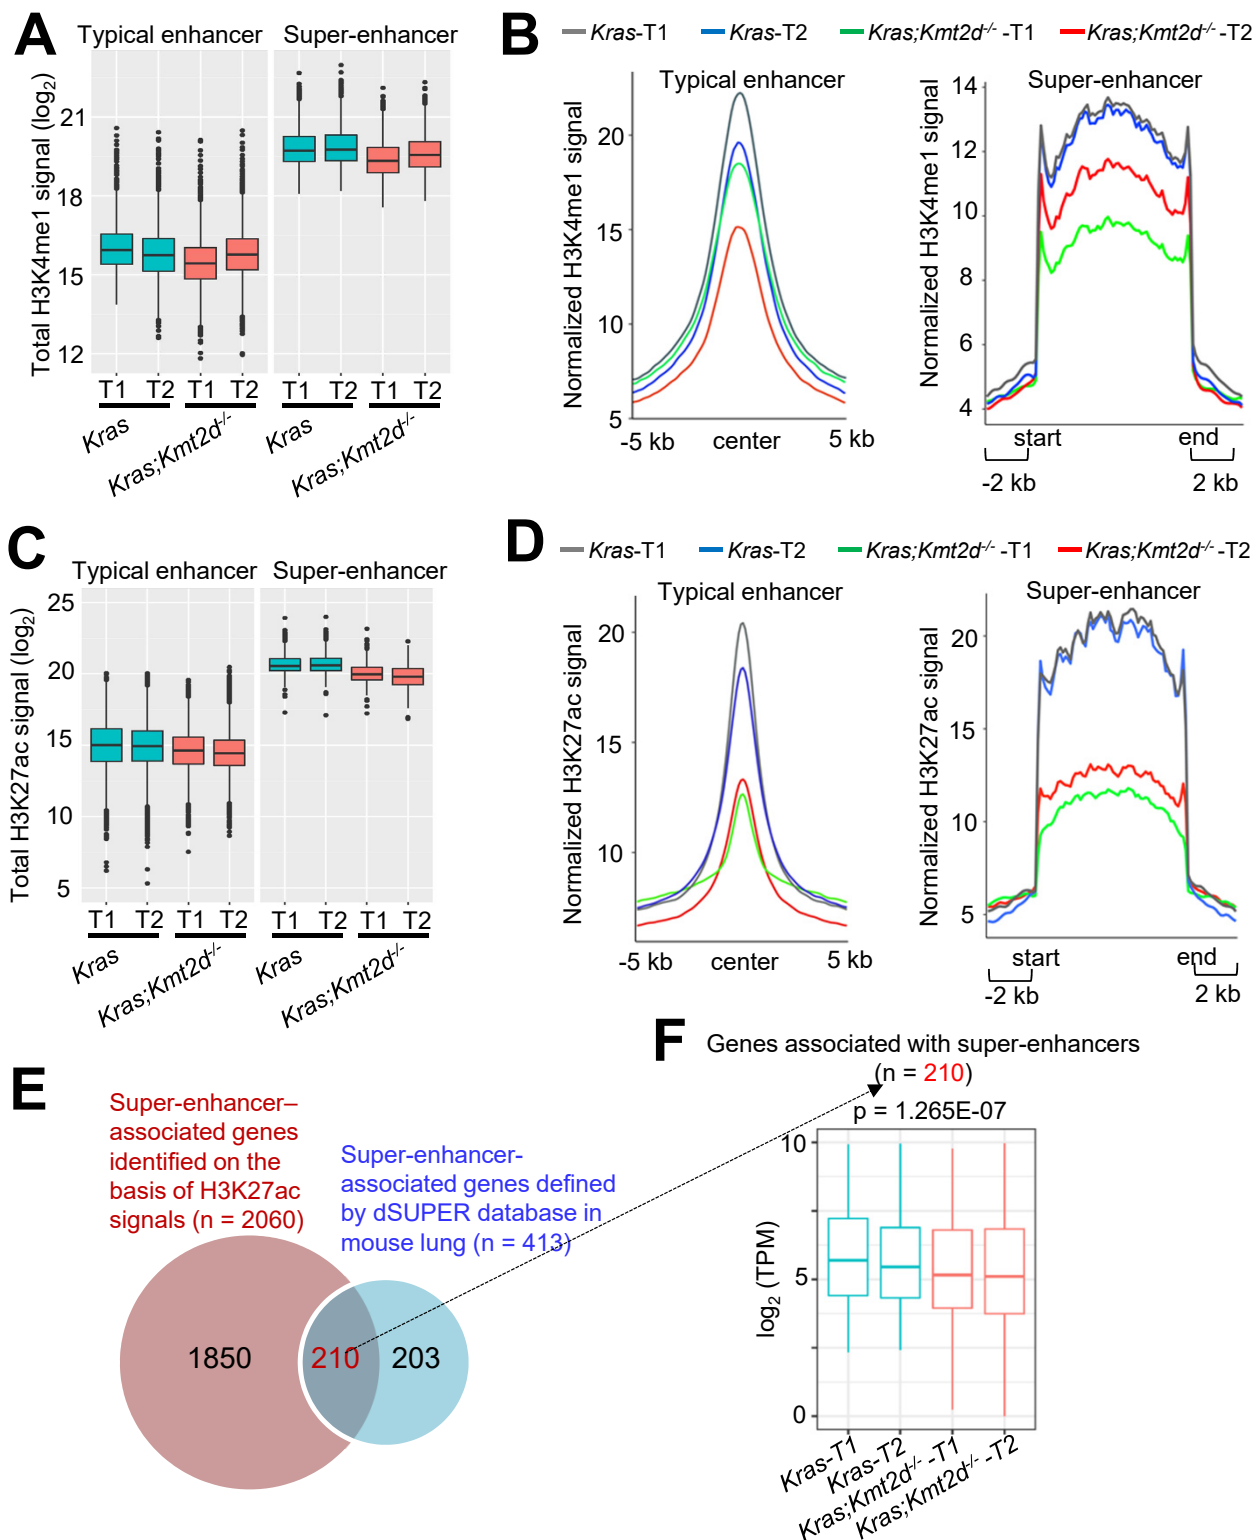

**Figure S4**, related to **Figure 4**: *Kmt2d* loss diminishes super-enhancer signals to a greater extent than typical enhancer signals and downregulates expression of lung-enriched, super-enhancer-associated genes in KRAS-induced lung adenocarcinoma. (**A** and **B**) Analysis of enhancers on the basis of H3K4me1 signals showed that *Kmt2d* loss diminishes more super-enhancers than typical enhancers. Shown are boxplots of H3K4me1 signals for typical enhancers and super-enhancers in *Kras* and *Kras;Kmt2d<sup>-/-</sup>* lung tumors (**A**). Intensities of ChIP-Seq reads for H3K4me1 at the typical enhancer (left panel) and the super-enhancer (right panel) regions were compared between *Kras* and *Kras;Kmt2d<sup>-/-</sup>* lung tumors (**B**). (**C** and **D**) Analysis of enhancers on the basis of H3K27ac signals showed that *Kmt2d* loss diminishes more super-enhancers than typical enhancers. Shown are boxplots of H3K27ac signals for typical enhancers and super-enhancers in *Kras* and *Kras;Kmt2d<sup>-/-</sup>* lung tumors (**C**). Intensities of ChIP-Seq reads for H3K27ac at the typical enhancer (left panel) and super-enhancer (right panel) regions were compared between *Kras* and *Kras;Kmt2d<sup>-/-</sup>* lung tumors (**D**). (**E**) Venn diagram shows that super-enhancer-associated genes in *Kras* lung tumors substantially overlap with mouse lung super-enhancer genes defined by the dbSUPER database (<http://bioinfo.au.tsinghua.edu.cn/dbsuper/>). Super-enhancer-associated genes in *Kras* lung tumors were defined on the basis of H3K27ac signals. (**E**) *Kmt2d* loss reduced expression of 210 super-enhancer-associated genes in *Kras* lung tumors. See “Quantification and statistical analysis” in the STAR Method for the description of the boxplots in (**A**), (**C**), and (**F**). T1, Tumor 1; T2, tumor 2.

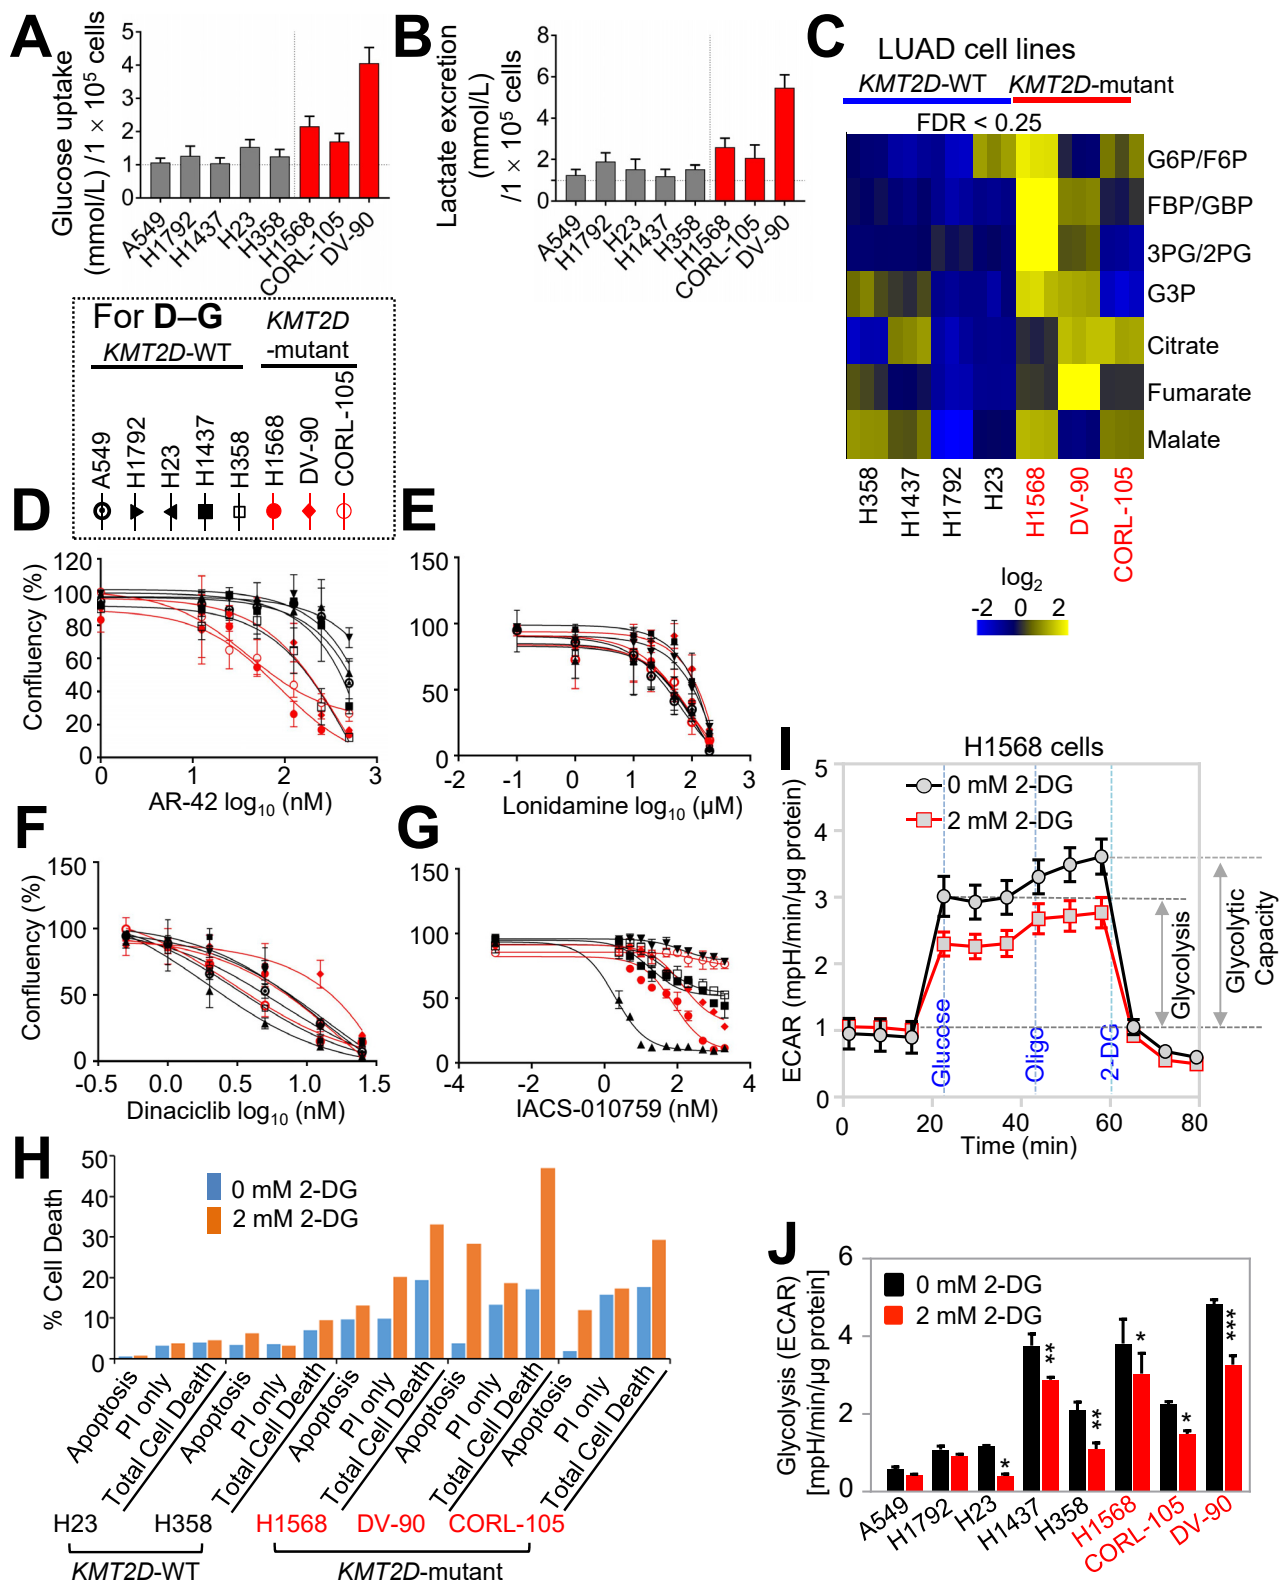

**Figure S5**, related to **Figure 5**: (**A** and **B**) There were tendencies of higher glucose uptake (**A**) and lactate excretion (**B**) in human LUAD cell lines bearing *KMT2D*-inactivating mutations (H1568, DV-90 and CORL105) than in human *KMT2D*-WT LUAD cell lines (A459, H1792, H1437, H23, and H358). (**C**) Heatmap showed that some metabolites associated with glycolysis and TCA pathway tended to be upregulated in *KMT2D*-mutant LUAD cell lines (H1568, DV-90 and CORL-105) as compared with *KMT2D*-WT LUAD cell lines (H1437, H23, H1792, and H358). G6P, Glucose-6-phosphate; F6P, Fructose-6-phosphate; GBP, Glucose-1,6-bisphosphate; FBP, Fructose-1,6-bisphosphate; G3P, Glycerol-3-phosphate; 3PG, 3-Phosphoglyceric acid; 2PG, 2-Phosphoglyceric acid; PEP, Phosphoenolpyruvate. (**D–G**) Dose response curves showed that none of AR-42 (**D**), Lonidamine (**E**), Dinaciclib (**F**), and IACS-010759 (**G**) selectively inhibited cell confluency of *KMT2D*-mutant LUAD cell lines over *KMT2D*-WT LUAD cell lines. (**H**) Propidium Iodide (PI) staining in combination with FITC-Annexin V staining showed that cell death was largely increased in *KMT2D*-mutant LUAD cell lines as compared with *KMT2D*-WT LUAD cell lines. (**I** and **J**) Metabolic assays using Seahorse showed that 2-DG tended to inhibit ECARs of *KMT2D*-mutant LUAD cell lines to a greater extent than those of *KMT2D*-WT LUAD cell lines. A ECAR graph for H1568 cells is shown (**I**), and ECARs were compared between *KMT2D*-WT and *KMT2D*-mutant LUAD cell lines (**J**). Oligo denotes Oligomycin. \*,  $p < 0.05$ ; \*\*,  $p < 0.01$ ; \*\*\*,  $p < 0.001$  (two-tailed Student's t-test).

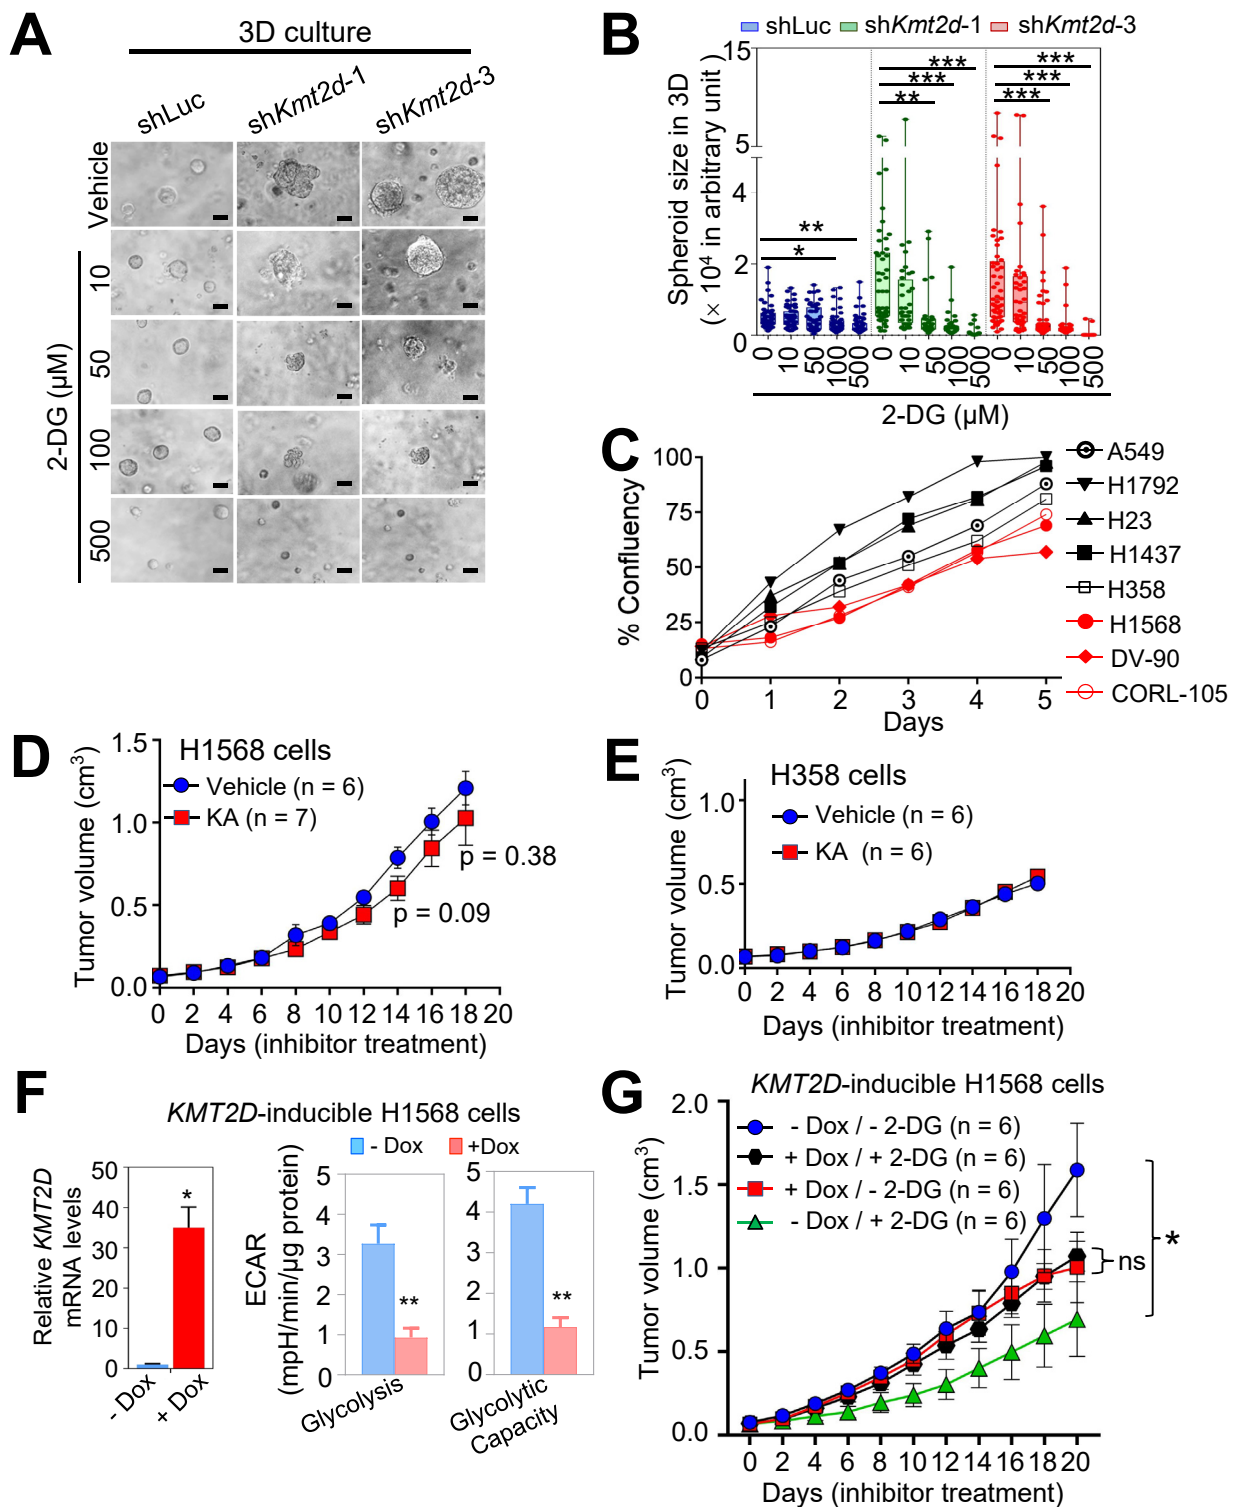

**Figure S6**, related to **Figure 5: (A & B)** Spheroid sizes of LKR-10 cells in a 3D-culture were increased by KMT2D knockdown (shKmt2d-1 and shKmt2d-3), and 2-DG treatment inhibited the spheroid growth of KMT2D-depleted LKR-10 cells. Representative images are shown (**A**). The boxplots present the relative sizes of spheroids in 3D-culture (**B**). shLuc-treated cells were used as a control. See “Quantification and statistical analysis” in the STAR Method for the description of the boxplots. Black scale bars, 200  $\mu$ m. (**C**) The proliferation rates are shown for human KMT2D-WT LUAD cell lines (A549, H1792, H23, H1437, and H358) and human KMT2D-mutant LUAD cell lines (H1568, DV-90, and CORL105). (**D and E**) Koningic acid (KA) had a weak and insignificant effect on tumorigenic growth of H1568 cells bearing an KMT2D-truncating mutation (**D**) while having no effect on tumorigenic growth of H358 cells bearing WT KMT2D (**E**) in a mouse subcutaneous xenograft model. The mice were treated with KA (1 mg per kg body weight) every other day for 20 days. (**F**) Doxycycline (Dox)-induced expression of KMT2D decreased ECAR in H1568 LUAD cells (Center and right panel). H1568 cells bearing Dox-inducible KMT2D were generated, and Dox-induced KMT2D mRNA levels were measured (Left panel). Data are presented as the mean  $\pm$  SEM (error bars) of at least three independent experiments or biological replicates. (**G**) Mouse subcutaneous xenograft results suggested that 2-DG selectively inhibited tumorigenic growth of KMT2D-inducible H1568 cells in Dox-untreated mice as compared with Dox-treated mice. Mice were treated with 2-DG (500 mg per kg body weight) or vehicle control every other day for 16 days. For Dox treatment, mice were fed with Dox-containing chow (200 mg Dox per kg of regular mouse chow). \*,  $p < 0.05$ ; \*\*,  $p < 0.01$ ; \*\*\*,  $p < 0.001$  (two-tailed Student’s t-test).

**Table S3**, related to **Figure 5**: Mutation status of the *KMT2D* gene in human lung cancer cell lines

| Cell line | Chr | Start Position | End Position | Variant Classification | Variant Type | Reference Allele | Tumor Seq Allele | Protein Change                 |
|-----------|-----|----------------|--------------|------------------------|--------------|------------------|------------------|--------------------------------|
| A549      | 12  | N/A            | N/A          | N/A                    |              |                  |                  | N/A                            |
| H1792     | 12  | N/A            | N/A          | N/A                    |              |                  |                  | N/A                            |
| H23       | 12  | N/A            | N/A          | N/A                    |              |                  |                  | N/A                            |
| H1437     | 12  | N/A            | N/A          | N/A                    |              |                  |                  | N/A                            |
| H358      | 12  | N/A            | N/A          | N/A                    |              |                  |                  | N/A                            |
| H1568     | 12  | 49445194       | 49445194     | Nonsense mutation      | SNP          | C                | A                | p.E758*                        |
| DV-90     | 12  | 49435199       | 49435199     | Frame_Shift_Del        | DEL          | G                | -                | p.Pro2118ProfsTer25(p.P2118fs) |
| CORL-105  | 12  | 49434991       | 49434991     | Frame_Shift_Del        | DEL          | G                | -                | p.Arg2188ProfsTer74(p.R2188fs) |

# A Characteristics of the top 14 genes

| #  | Gene            | log <sub>2</sub> FC (RNA-seq) | p value (RNA-seq) | log <sub>2</sub> FC (H3K27ac) | p value (H3K27ac) | r (Pearson correlation) | FC_LUAD        |                | Survival   |
|----|-----------------|-------------------------------|-------------------|-------------------------------|-------------------|-------------------------|----------------|----------------|------------|
|    |                 |                               |                   |                               |                   |                         | (Tumor/Normal) | p value (LUAD) |            |
| 1  | <i>SHANK2</i>   | -2.0252                       | 0.005409          | -4.28972                      | 4.36E-05          | 0.49                    | 0.596          | ***            | Low; Poor  |
| 2  | <i>MLANA</i>    | -1.74409                      | 0.023769          | -1.52758                      | 0.414633          | 0.33                    | 0.626          | ***            | High; Poor |
| 3  | <i>TRAF3IP1</i> | -1.54151                      | 0.001934          | -1.73023                      | 0.07758           | 0.42                    | 0.968          | Not sig        | Low; Poor  |
| 4  | <i>ACACB</i>    | -1.16118                      | 7.75E-05          | -2.72969                      | 0.003311          | 0.53                    | 0.312          | ***            | Low; Poor  |
| 5  | <i>CRACR2A</i>  | -1.06423                      | 3.95E-04          | -2.89113                      | 0.002267          | 0.3                     | 2.03           | ***            | High; Poor |
| 6  | <i>KIFC3</i>    | -1.04796                      | 9.53E-05          | -1.43475                      | 0.062539          | 0.33                    | 1.03           | Not sig        | High; Poor |
| 7  | <i>CASZ1</i>    | -0.96877                      | 0.002018          | -1.06683                      | 0.156928          | 0.37                    | 0.459          | ***            | High; Poor |
| 8  | <i>PER2</i>     | -0.92642                      | 0.084606          | -1.66447                      | 0.063166          | 0.35                    | 0.77           | ***            | Low; Poor  |
| 9  | <i>NFASC</i>    | -0.89593                      | 0.141034          | -2.22851                      | 0.033627          | 0.3                     | 0.27           | ***            | Low; Poor  |
| 10 | <i>CLCN6</i>    | -0.86943                      | 5.63E-04          | -2.27149                      | 0.016607          | 0.48                    | 0.675          | ***            | Low; Poor  |
| 11 | <i>TNS2</i>     | -0.852                        | 0.014909          | -1.09323                      | 0.129067          | 0.31                    | 0.326          | **             | Not sig    |
| 12 | <i>ANKRD23</i>  | -0.81188                      | 0.036254          | -1.24506                      | 0.252309          | 0.33                    | 3.11           | ***            | Low; Poor  |
| 13 | <i>TMEM2</i>    | -0.79389                      | 0.046892          | -1.10537                      | 0.165816          | 0.33                    | 0.66           | ***            | High; Poor |
| 14 | <i>NAV2</i>     | -0.75495                      | 0.049805          | -1.82735                      | 0.0531            | 0.43                    | 0.983          | Not sig        | Low; Poor  |

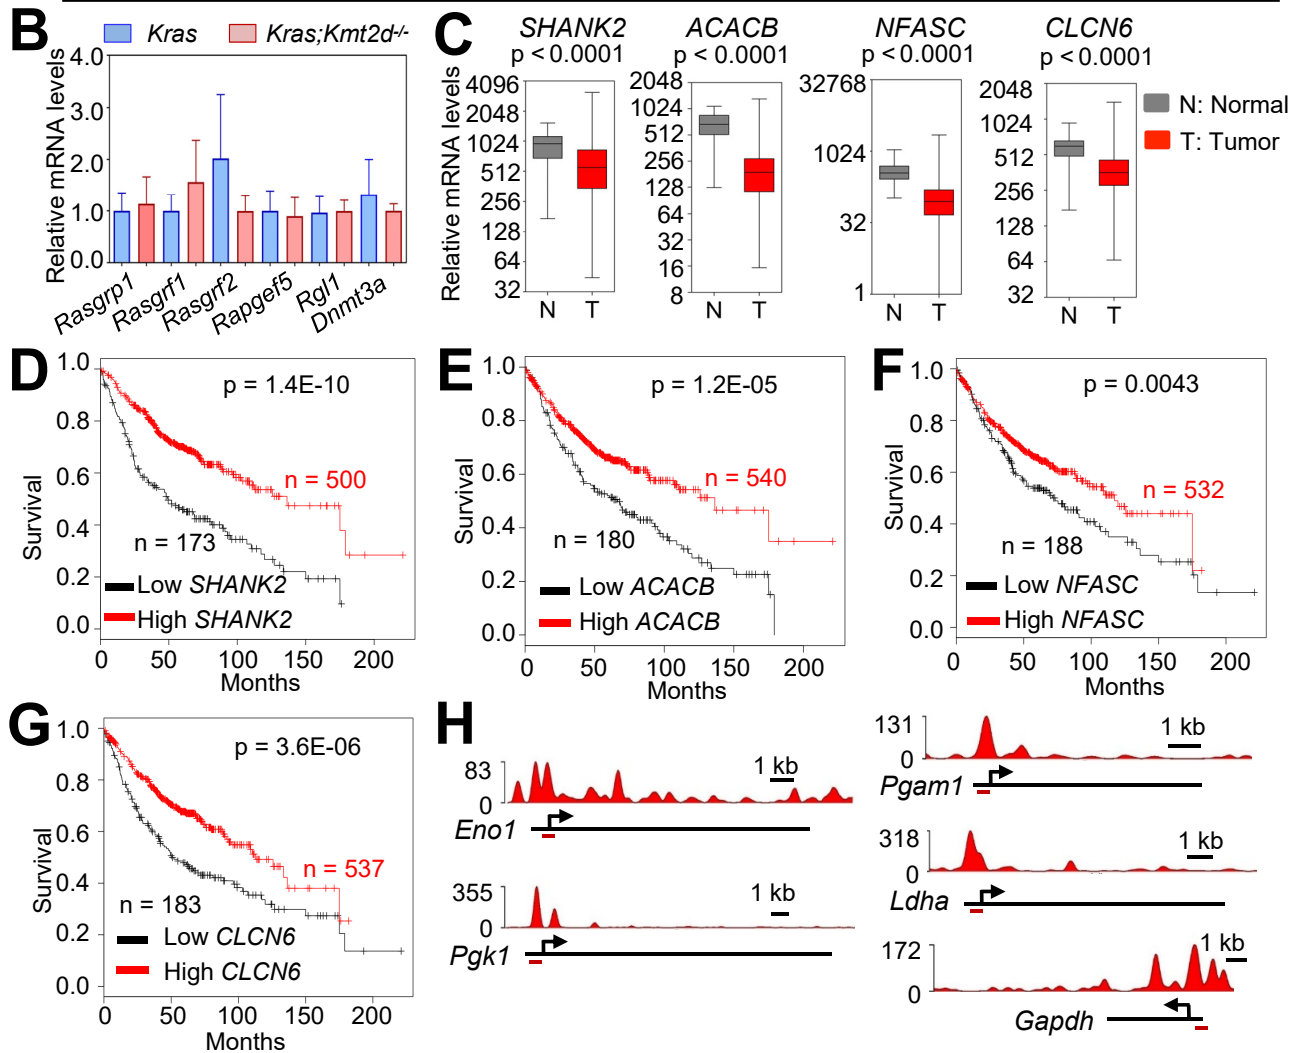

**Figure S7**, related to **Figures 6 and 7H**: **(A)** Five different characteristics were analyzed for the top 14 genes identified as candidate repressors of glycolysis programs that were upregulated by *Kmt2d* loss. FC, fold change; sig, significant.; \*\*,  $p < 0.01$ ; \*\*\*,  $p < 0.001$  (two-tailed Student's t-test). **(B)** Quantitative RT-PCR results showed that *Kmt2d* loss did not affect expression of *Dnmt3* and Ras activators (*Rasgrp1*, *Rasgrf1*, *Rasgrf2*, *Rapgef5*, and *Rgl1*) in *Kras* tumors. **(C)** *SHANK2*, *ACACB*, *NFASC*, and *CLCN6* mRNA levels were downregulated in lung adenocarcinoma tumor samples ( $n = 357$ ) as compared with their adjacent normal tissue samples ( $n = 54$ ) in the TCGA dataset. See "Quantification and statistical analysis" in the STAR Method for the description of the boxplots. **(D-G)** Kaplan-Meier survival analysis using the KM Plotter database (<http://kmplot.com/analysis>) showed that low *SHANK2* **(D)**, *ACACB* **(E)**, *NFASC* **(F)**, and *CLCN6* **(G)** mRNA levels correlated with worse survival of human lung cancer patients. The lower quartile cutoff was used to divide samples into low and high groups. The statistical analyses were performed using the two-sided log-rank test. *SHANK2*, probe set 243681\_at; *ACACB*, probe set 49452\_at; *NFASC*, probe set 213438\_at; *CLCN6*, probe set 203950\_at. **(H)** Our analysis of six sets of public ChIP-seq data (GSM982733, GSM982734, GSM982735, GSM982736, GSM982737, and GSM982738) indicate that *PER2* occupied the regions surrounding the transcription start sites. The red bars indicate PCR amplicons (related to **Fig. 7H**).



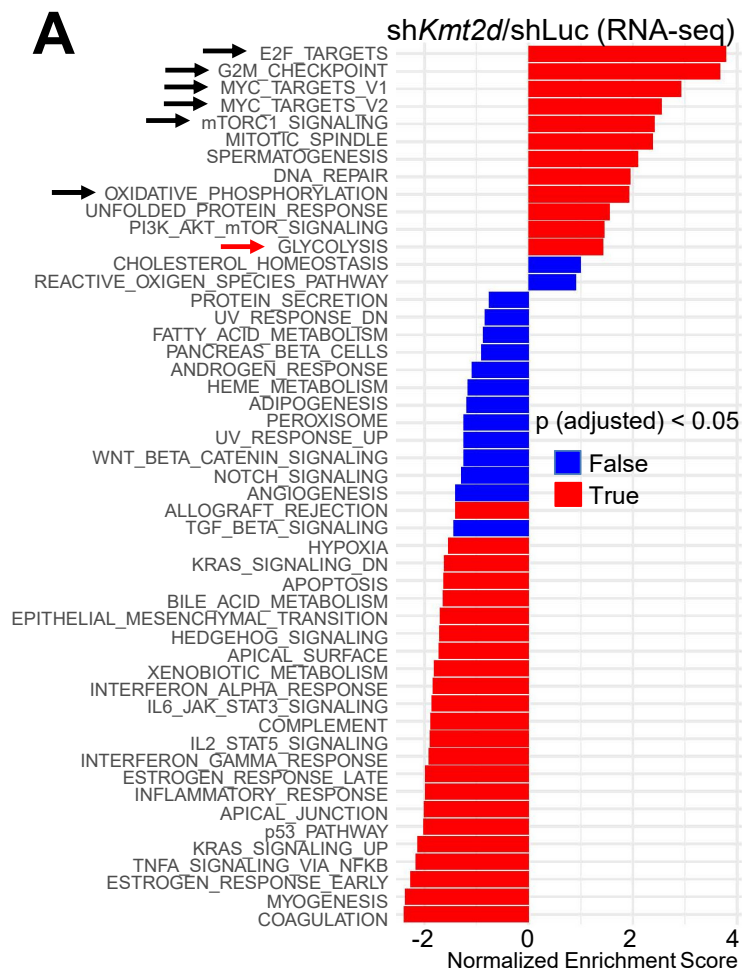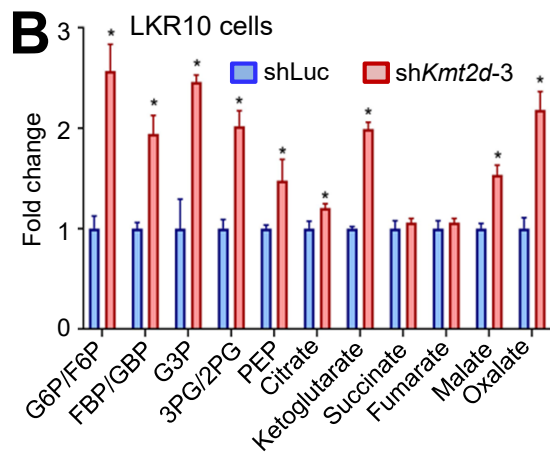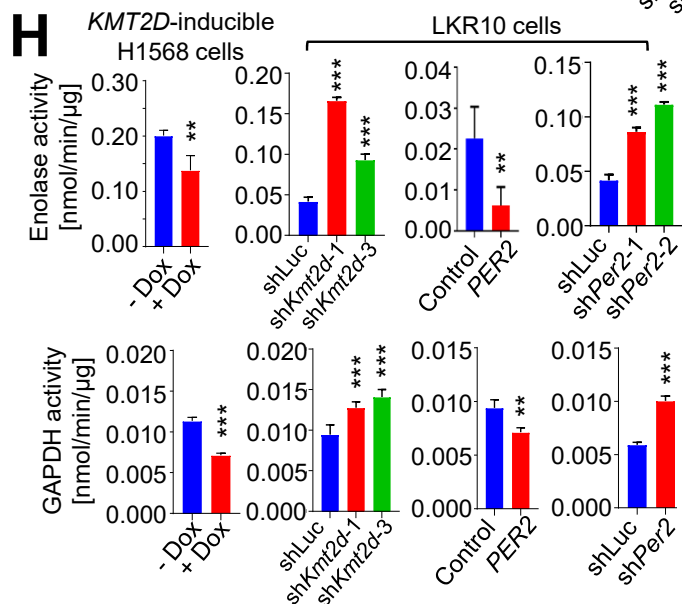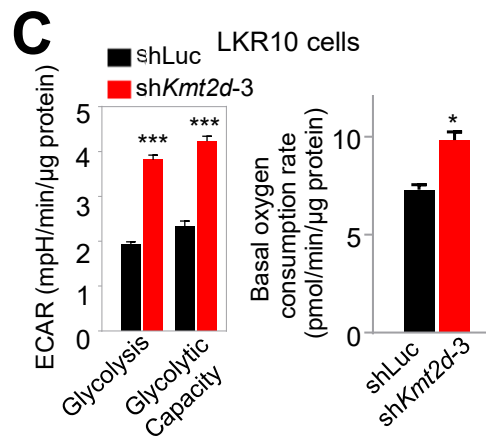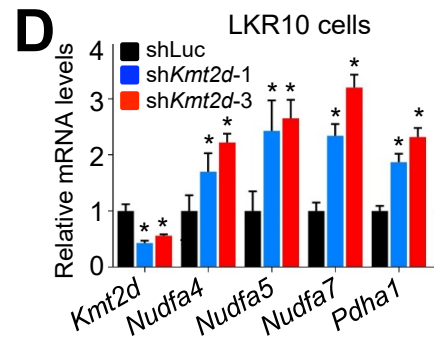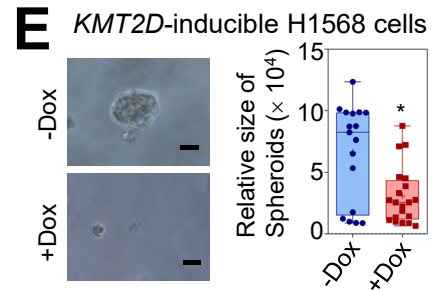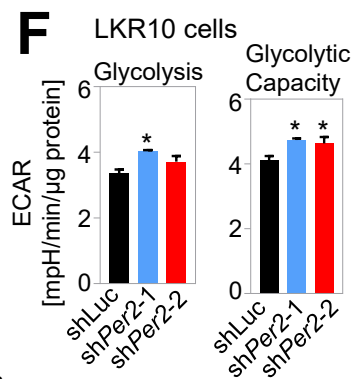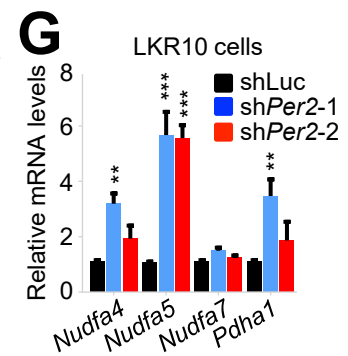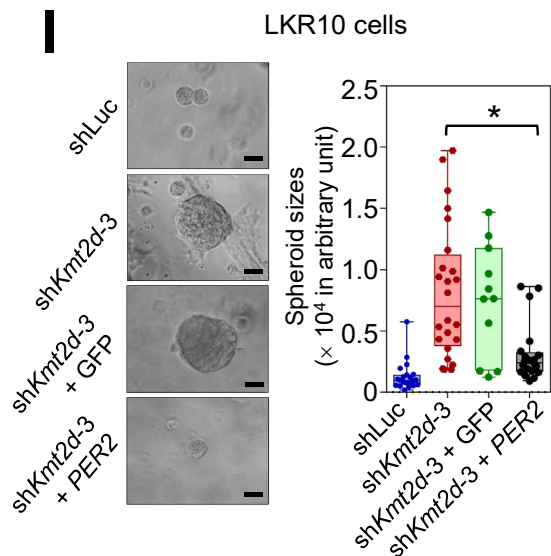

**Figure S8:** related to **Figure 8**.

(**A**) GSEA analysis of RNA-seq data showed that KMT2D knockdown increased tumor-promoting programs, such as glycolysis, OXPHOS, E2F targets, and MYC targets, in mouse LKR10 cells. *shKmt2d* represents a combination of two RNA-seq datasets of *shKmt2d-1*-treated cells and two RNA-seq datasets of *shKmt2d-3*-treated cells. *shLuc* (*shLuciferase*) indicates a combination of two RNA-seq datasets of *shLuc*-treated cells. The MsigDB Gene Set was used as a reference. (**B**) Mass spectrometric analysis of metabolomics showed that KMT2D knockdown upregulated many glycolysis metabolites and certain TCA metabolites in mouse LKR-10 cells. G6P, Glucose-6-phosphate; F6P, Fructose-6-phosphate; GBP, Glucose-1,6-bisphosphate; FBP, Fructose-1,6-bisphosphate; G3P, Glycerol-3-phosphate; 3PG, 3-Phosphoglyceric acid; 2PG, 2-Phosphoglyceric acid; PEP, Phosphoenolpyruvate. (**C**) Metabolic assays using Seahorse showed that KMT2D knockdown in LKR10 cells increased ECAR but slightly augmented oxygen consumption rate. (**D**) Quantitative RT-PCR analysis demonstrated that KMT2D knockdown increased expression of the OXPHOS genes *Ndufa4*, *Ndufa5*, *Ndufa7*, and *Pdha1* in mouse LKR-10 cells. (**E**) Dox-induced expression of *KMT2D* decreased spheroid sizes of H1568 cells bearing an *KMT2D*-inactivating mutation in a 3D culture. Representative images of spheroids are shown (left panel). The sizes of the spheroids were quantified (right panel). Dox-untreated cells were used as a control. Dox was used in a concentration of 10  $\mu$ g/ml. Black scale bars, 200  $\mu$ m. (**F & G**) *PER2* knockdown increased ECARs (**F**) and expression of certain OXPHOS genes (**G**) in LKR10 cells. (**H**) Enzyme assays showed that *KMT2D* or *PER2* knockdown upregulated *ENO1* and *GAPDH* activities in LKR10 cells whereas *KMT2D* or *PER2* overexpression reduced their activities in H1568 cells or LKR10 cells, respectively. The expression plasmid pLenti-*PER2* was used for *PER2* overexpression. (**I**) Exogenous *PER2* expression reduced spheroid sizes of *KMT2D*-depleted LKR-10 cells in a 3D-culture. Representative images of spheroids are shown (left panel). The sizes of the spheroids were quantified (right panel). *shLuc* and pLenti-GFP viruses were used as controls. Black scale bars represent 200  $\mu$ m. In (**B–D**) and (**F–H**), data are presented as the mean  $\pm$  SEM (error bars) of at least three independent experiments or biological replicates. See “Quantification and statistical analysis” in the STAR Method for the description of the boxplots in **E** and **I**. \*,  $p < 0.05$ ; \*\*,  $p < 0.01$ ; \*\*\*,  $p < 0.001$  (two-tailed Student’s t-test).

**Table S4**, related to **STAR Methods**: Oligonucleotides

| <b>Oligonucleotides</b>                                  |   |                                   |                             |            |
|----------------------------------------------------------|---|-----------------------------------|-----------------------------|------------|
| <b>Primers for quantitative RT-PCR (mouse)</b>           |   |                                   |                             |            |
| Gene                                                     |   | Sequence                          | Source                      | IDENTIFIER |
| <i>Kmt2d</i>                                             | F | GGC GTT GTG TGG AGT GTA TC        | Integrated DNA Technologies | N/A        |
|                                                          | R | CAC AGT CAT CAC AGA GCA GC        |                             |            |
| <i>Eno1</i>                                              | F | CAT GGG GAA GGG TGT CTC AC        | Integrated DNA Technologies | N/A        |
|                                                          | R | GTG CCG TCC ATC TCG ATC AT        |                             |            |
| <i>Pgk1</i>                                              | F | ATG TCG CTT TCC AAC AAG CTG       | Integrated DNA Technologies | N/A        |
|                                                          | R | GCT CCA TTG TCC AAG CAG AAT       |                             |            |
| <i>Pgam1</i>                                             | F | TCT GTG CAG AAG AGA GCA ATC C     | Integrated DNA Technologies | N/A        |
|                                                          | R | CTG TCA GAC CGC CAT AGT GT        |                             |            |
| <i>Gapdh</i>                                             | F | CATGGCCTTCCGTGTTTCTA              | Integrated DNA Technologies | N/A        |
|                                                          | R | GCCTGCTTCACCACCTTCTT              |                             |            |
| <i>Ldha</i>                                              | F | ACC TCG GTA TTA TTT TTC CAT TTC A | Integrated DNA Technologies | N/A        |
|                                                          | R | TGT AAT CTT GTT CTG GGG AGC C     |                             |            |
| <i>Per2</i>                                              | F | GAA AGC TGT CAC CAC CAT AGA A     | Integrated DNA Technologies | N/A        |
|                                                          | R | AAC TCG CAC TTC CTT TTC AGG       |                             |            |
| <i>Cdk1</i>                                              | F | AGA AGG TAC TTA CGG TGT GGT       | Integrated DNA Technologies | N/A        |
|                                                          | R | GAG AGA TTT CCC GAA TTG CAG T     |                             |            |
| <i>Ndufa4</i>                                            | F | CGG CTT AGC GTG TGT CCT AA        | Integrated DNA Technologies | N/A        |
|                                                          | R | GCC AAG CGC ATC ACA TAC AG        |                             |            |
| <i>Ndufa5</i>                                            | F | GAT TGA GCG GGC TTG GGA AA        | Integrated DNA Technologies | N/A        |
|                                                          | R | AAC ATC TGG CTC CTC GTG TG        |                             |            |
| <i>Ndufa7</i>                                            | F | CCGCTACTCGCGTTATCCAA              | Integrated DNA Technologies | N/A        |
|                                                          | R | TTGGACAGCTTGTGACTGGG              |                             |            |
| <i>Pdha</i>                                              | F | GCA AAC TTG AAG CCA GCC ATC       | Integrated DNA Technologies | N/A        |
|                                                          | R | TCC ACA CCT CTA CAC AGA GC        |                             |            |
| <i>Gpi1</i>                                              | F | TGG CAA ATC CAT CAC GGA CA        | Integrated DNA Technologies | N/A        |
|                                                          | R | GGA AGT CTC AGG GGA CAA GC        |                             |            |
| <i>Actin</i>                                             | F | GGC TGT ATT CCC CTC CAT CG        | Integrated DNA Technologies | N/A        |
|                                                          | R | CCA GTT GGT AAC AAT GCC ATG T     |                             |            |
| 18S                                                      | F | TAGAGGGACAAGTGGCGTTC              | Integrated DNA Technologies | N/A        |
|                                                          | R | CGCTGAGCCAGTCAGTGT                |                             |            |
| <b>Primers for quantitative RT-PCR for enhancer RNAs</b> |   |                                   |                             |            |
| <i>Per2-E1</i>                                           | F | GTG GGT CCA ACC TCT CCA AG        | Integrated DNA Technologies | N/A        |
|                                                          | R | ATG CTC GCC ATC CAC AAG AA        |                             |            |
| <i>Per2-E2</i>                                           | F | CAA CTG TTT GCC TCT TGC CC        | Integrated DNA Technologies | N/A        |
|                                                          | R | GAG CTG GCT TCC CTT CTC AG        |                             |            |
| <b>Primers for genotyping</b>                            |   |                                   |                             |            |
| <i>Kmt2d<sup>fl/fl</sup></i>                             | F | AGAATGGACACTGGAGCTCC              | Integrated DNA Technologies | N/A        |
|                                                          | R | AGAAATCCCCAACCACAGC               |                             |            |
| <i>Trp53<sup>fl/fl</sup></i>                             | F | GGT TAA ACC CAG CTT GAC CA        | Integrated DNA Technologies | N/A        |
|                                                          | R | GGA GGC AGA GAC AGT TGG AG        |                             |            |
| <i>Kras<sup>LSL-G12D</sup></i>                           | F | CTA GCC ACC ATG GCT TGA GT        | Integrated DNA Technologies | N/A        |
|                                                          | R | TCC GAA TTC AGT GAC TAC AGA TG    |                             |            |
| <b>Primers for quantitative CHIP-PCR (mouse)</b>         |   |                                   |                             |            |
| <i>Per2-A</i>                                            | F | AGC AGG GTC ATG TTG AGC ATT C     |                             | N/A        |

|                            |   |                                                         |                             |             |
|----------------------------|---|---------------------------------------------------------|-----------------------------|-------------|
|                            | R | AGG TTC TTG CCA TGA AGA AGG TA                          | Integrated DNA Technologies |             |
| <i>Per2-B</i>              | F | GGT GCA CAT CCA TAG AAC TGA GA                          | Integrated DNA Technologies | N/A         |
|                            | R | TGA ATG TCA TGA GTC CCT CAG C                           |                             |             |
| <i>Per2-C</i>              | F | ATT GAC GGC AAT GGT GGC TA                              | Integrated DNA Technologies | N/A         |
|                            | R | TGC AGG CCA AAT GTA GAG CA                              |                             |             |
| <i>Per2-D</i>              | F | CTCCCGTCATTTCTCTTCAC                                    | Integrated DNA Technologies | N/A         |
|                            | R | GTTAAGGAGCCAGAGACACAAG                                  |                             |             |
| <i>Eno1</i>                | F | TAA CGA GCA GGA AAG GAA GAC                             | Integrated DNA Technologies | N/A         |
|                            | R | AGG AGA GCC TTA AGG ACA GA                              |                             |             |
| <i>Pgk1</i>                | F | CAA CCG GCT CCG TTC TTT                                 | Integrated DNA Technologies | N/A         |
|                            | R | GTG AGA CGT GCT ACT TCC ATT T                           |                             |             |
| <i>Pgam1</i>               | F | GTG GCA GAG ACA GGA AAT CT                              | Integrated DNA Technologies | N/A         |
|                            | R | GAC AGT CTC TCT GCG TAA CC                              |                             |             |
| <i>Ldha</i>                | F | GCG GAG GAT CGA TGC ATT TC                              | Integrated DNA Technologies | N/A         |
|                            | R | ACG ATG TCC CTG CAA GAG T                               |                             |             |
| <i>Gapdh</i>               |   |                                                         | Active motif                | Cat#: 71018 |
| <b>Primers for cloning</b> |   |                                                         |                             |             |
| MLL4 into pInducer 20      | F | GGGGACAACCTTTGTACAAAAAAGTTGGCa<br>tggacagccagaagctg     | Integrated DNA Technologies | N/A         |
|                            | R | GGGGACAACCTTTGTACAAGAAAGTTGGG<br>gttcatccatttccgacaattc |                             |             |
